# Supplementary material for: Low-Viscosity Hydrophobic Deep Eutectic Solvents as Sustainable Lubricants for Ball Screws
Source: Research Square preprint supplement (doi:10.21203/rs.3.rs-8513205/v1), 2026-01-07
Supplement: Supplementary file 1 [file 17146f868ce214f5ba0919dc.docx]

**Supplementary Information**

Low-Viscosity Hydrophobic Deep Eutectic Solvents as Sustainable Lubricants for Ball Screws

Yibiao Wang1, Changguang Zhou1, Tianyu Gao1, Nan Kang2, Mohamed EL Mansori2, Michel Fillon3, Wentao Bi4,*, Wenling Zhang1,*

*1 School of Mechanical Engineering, Nanjing University of Science and Technology, Nanjing 210094, China.*

*2 Arts et Metiers Institute of Technology, MSMP, F-51006, Châlons-en-Champagne, France*

*3 Pprime Institute, CNRS-University of Poitiers, Mechanical Engineering and Complex Systems Dept., SP2MI-H1, 11 Bd Marie et Pierre Curie, TSA 41123, 86073 Poitiers, France*

*4 Jiangsu Collaborative Innovation Center of Biomedical Functional Materials, Jiangsu Key Laboratory of Biomedical Materials, College of Chemistry and Materials Science, Nanjing Normal University, 1 Wenyuan Road, Nanjing 210023, China*

** Corresponding author. E-mail addresses:*

*wlzhang@njust.edu.cn, biwentao@njnu.edu.cn.*

**Table. S1.** Compositions, Chemical Structures, and Reagent Abbreviations of the synthesized six types of DESs.

| **Abbreviation** | | **HBA** | **HBD** | | **DES** | **Molar Ratio**  **(HBA:HBD)** | | |
| --- | --- | --- | --- | --- | --- | --- | --- | --- |
| DES-LT1 | **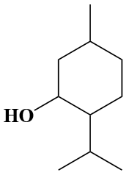** | | | **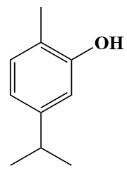** | **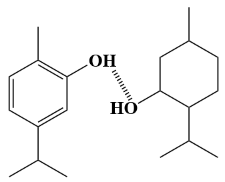** | | 1:2 |
| DES-LT2 | 1:1 |
| DES-LT3 | 2:1 |
| DES-LC1 | 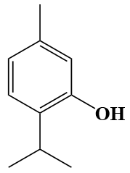 | 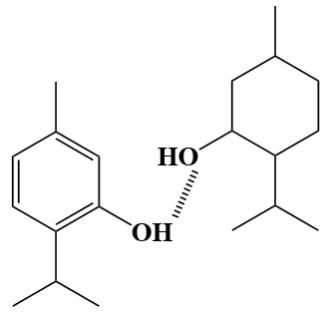 | | 1:2 |
| DES-LC2 | 1:1 |
| DES-LC3 | 2:1 |

**Table. S2.** Hydrogen bond strength of pure liquids comprising DES feedstock

| Compounds for calculation | | Molecular 3D model | ΔE(kcal/mol) |
| --- | --- | --- | --- |
| L-Menthol+ L-Menthol | | 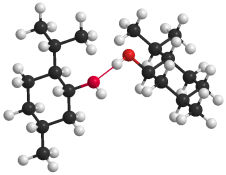 | 7.17 |
| Thymol+ Thymol | 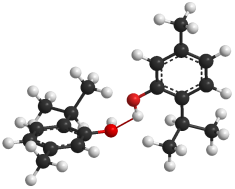 | | 33.57 |
| Carvacrol+ Carvacrol | 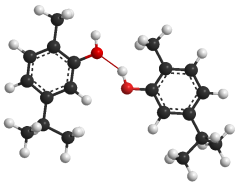 | | 32.42 |
| DES-LT2 | 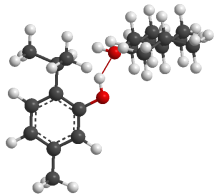 | | 8.23 |
| DES-LC2 | 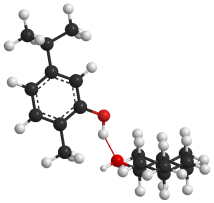 | | 8.98 |


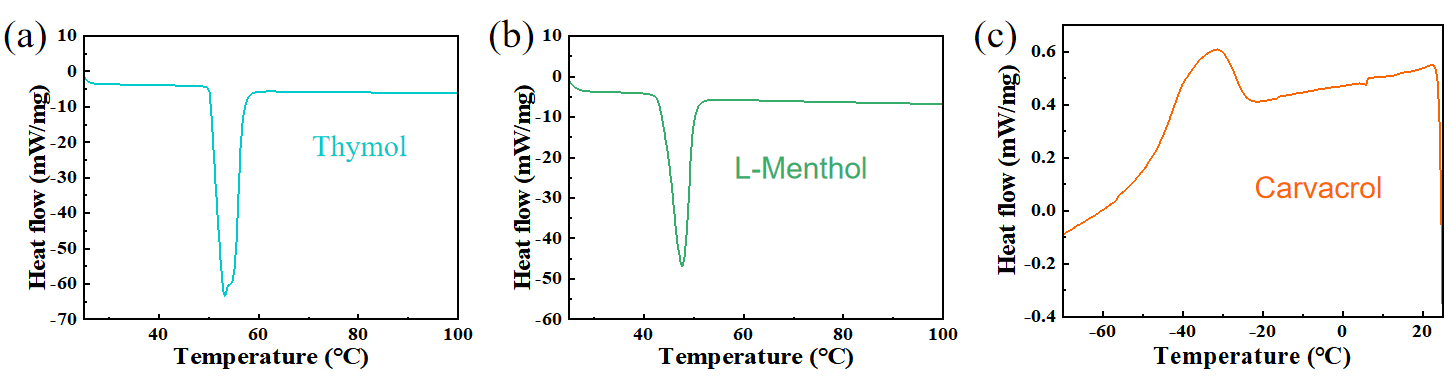


**Fig. S1.** DSC Results of (a)Thymol, (b)Menthol, and(c) Carvacrol.


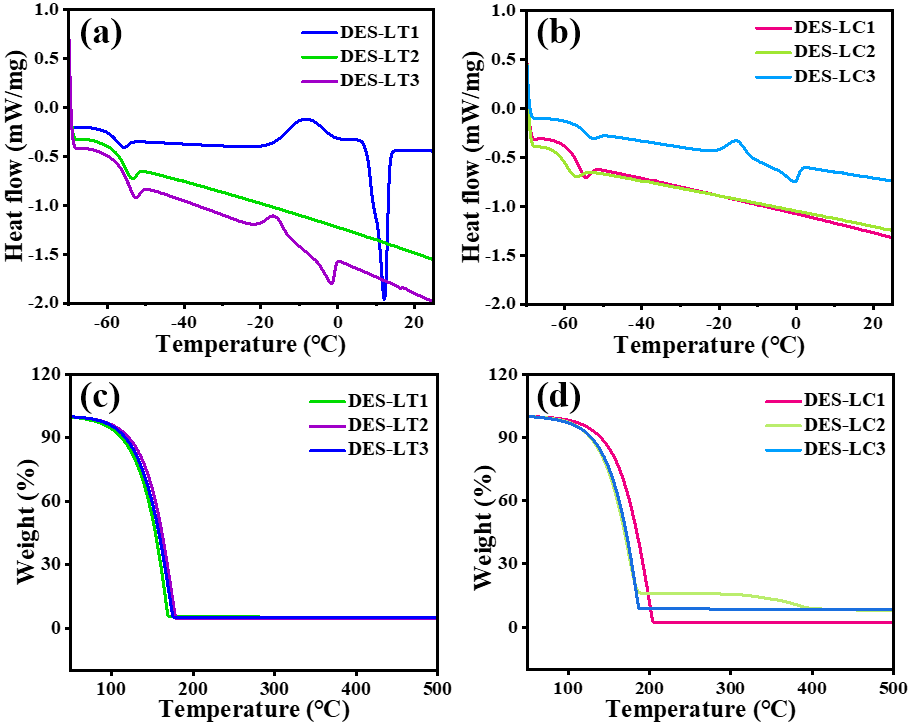


**Fig. S2.** Thermal analysis curves of DESs with different molar ratios: (a) DSC curves of DES-LT, (b) DSC curves of DES-LC, (c) TGA curves of DES-LT, (d) TGA curves of DES-LC.


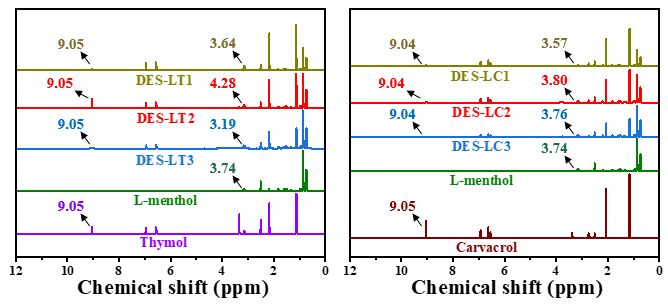


**Fig. S3.** The ¹H NMR spectra of the raw materials (L-menthol, thymol, carvacrol) and (a1-3) DES-LTs, (b1-3) DES-LCs.


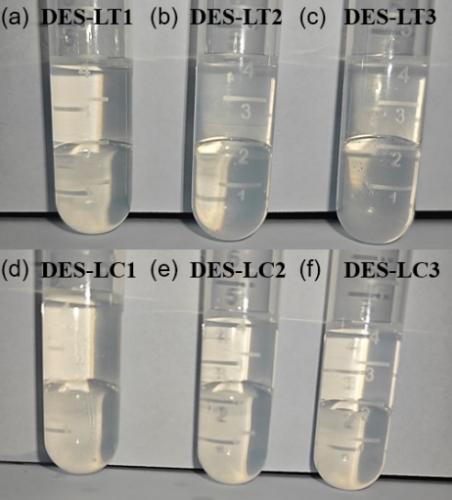


**Fig. S4.** Images of six DESs mixed with water and allowed to stand


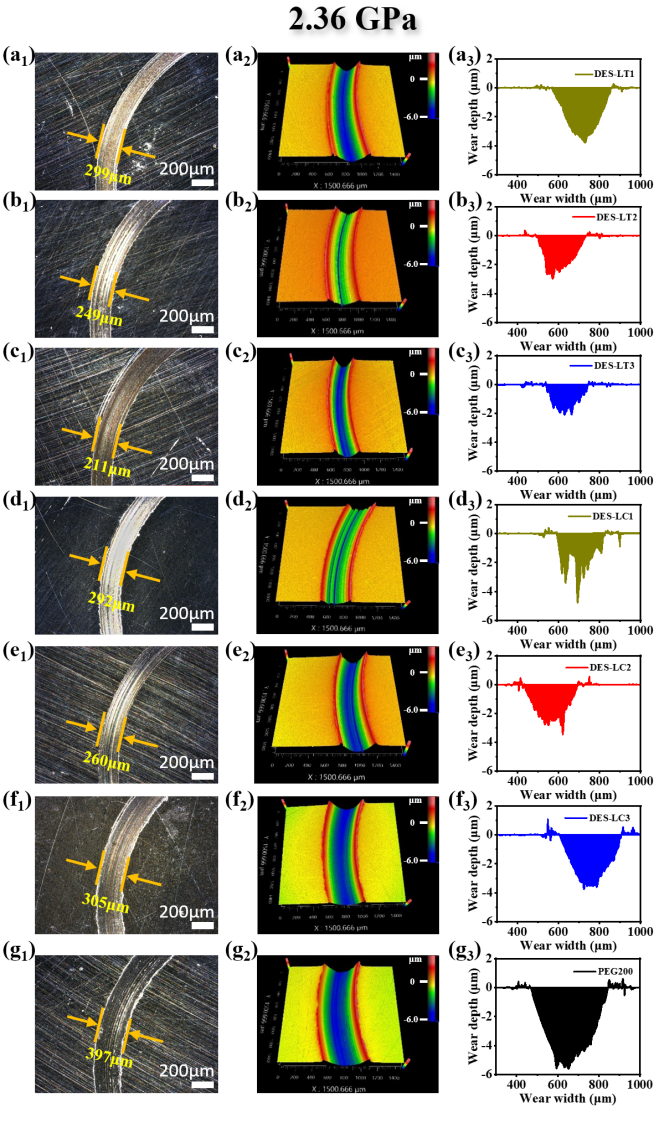


**Fig. S5.** 2D optical micrographs, 3D morphology and cross-sectional dimensions of wear tracks: (a1-a3) PEG200, (b1-b3) DES-LT1, (c1-c3) DES-LT2, (d1-d3) DES-LT3, (e1-e3) DES-LC1, (f1-f3) DES-LC2, (g1-g3) DES-LC3 under 2.36 GPa.


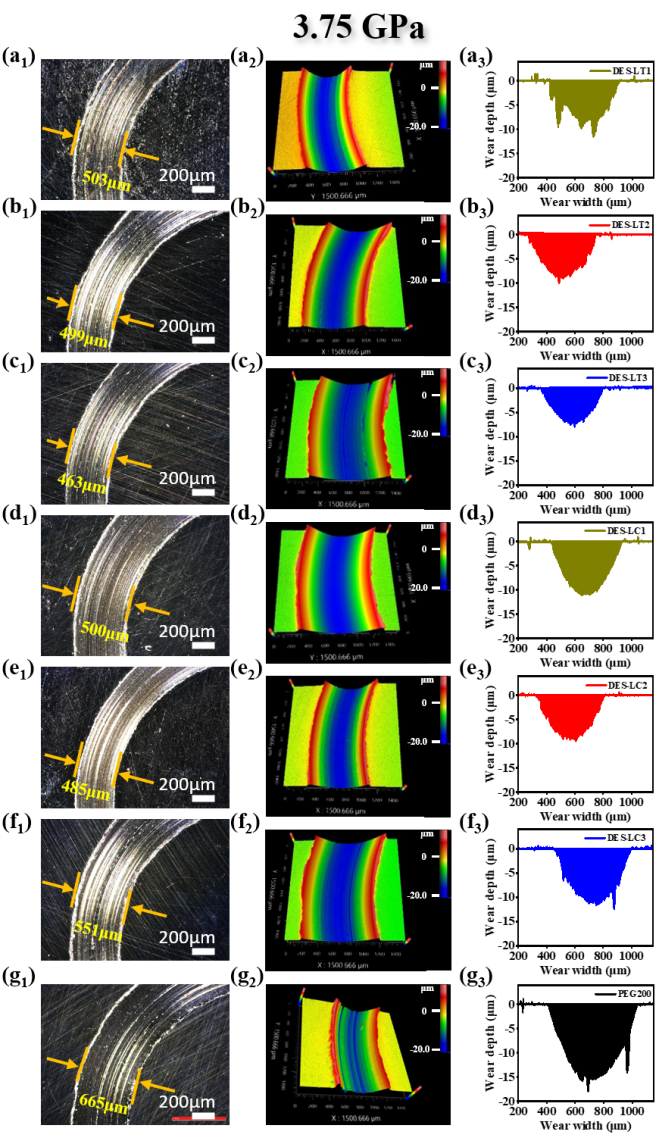


**Fig. S6.** 2D optical micrographs, 3D morphology and cross-sectional dimensions of wear tracks: (a1-a3) PEG200, (b1-b3) DES-LT1, (c1-c3) DES-LT2, (d1-d3) DES-LT3, (e1-e3) DES-LC1, (f1-f3) DES-LC2, (g1-g3) DES-LC3 under 3.75 GPa.
